## **Modulation of dorsal premotor cortex disrupts neuroplasticity of primary motor cortex in young and older adults**

Wei-Yeh Liao<sup>1</sup>, George M. Opie<sup>1</sup>, Ulf Ziemann<sup>2,3</sup> & John G. Semmler<sup>1</sup>

1. Discipline of Physiology, School of Biomedicine, The University of Adelaide, Adelaide, Australia.
2. Department of Neurology & Stroke, Eberhard Karls University of Tübingen, Tübingen, Germany
3. Hertie-Institute for Clinical Brain Research, Eberhard Karls University of Tübingen, Tübingen, Germany

**Running title:** Premotor effects on motor cortex plasticity in young and older adults

**Correspondence:** Wei-Yeh Liao  
School of Biomedicine  
The University of Adelaide  
Adelaide, South Australia 5005  
Australia  
Telephone: Int + 61 4 3771 9665  
E-mail: wei-yeh.liao@adelaide.edu.au

## Key points

- The influence of dorsal premotor cortex (PMd) on M1 plasticity is likely mediated by late I-wave interneuronal circuits within M1, but this communication may change with advancing age.
- We investigated the effects of intermittent theta burst stimulation (iTBS) to M1 when preceded by iTBS to PMd on transcranial magnetic stimulation (TMS) measures of M1 excitability in young and older adults.
- We found that PMd iTBS disrupts the plasticity induction of M1 iTBS in both young and older adults when measured with posterior-anterior (PA, early I-waves) current TMS, but not with anterior-posterior (AP, late I-waves) TMS measures of M1 excitability.
- The plasticity of early I-waves within M1 are specifically influenced by PMd iTBS in both young and older adults, suggesting that this communication is preserved with ageing.

## 1 **Abstract**

2 Previous research using transcranial magnetic stimulation (TMS) demonstrates that dorsal  
3 premotor cortex (PMd) influences neuroplasticity within primary motor cortex (M1). This  
4 communication is likely mediated by indirect (I) wave inputs within M1, the activity of  
5 which are altered by ageing. However, it remains unclear if age-related changes in the I-wave  
6 circuits modify the influence of PMd on M1 plasticity. The present study therefore  
7 investigated the influence of PMd on the plasticity of early and late I-wave circuits within M1  
8 of young and older adults. 15 young (mean  $\pm$  SD;  $24.7 \pm 5.0$  years) and 15 older adults ( $67.2$   
9  $\pm 5.4$  years) participated in two experimental sessions that examined the effects of  
10 intermittent theta burst stimulation (iTBS) to M1 when preceded by iTBS (PMd iTBS-M1  
11 iTBS) or sham stimulation (PMd sham-M1 iTBS) to PMd. Changes in M1 excitability post-  
12 intervention were assessed with motor evoked potentials (MEP) recorded from right first  
13 dorsal interosseous muscle, with posterior-to-anterior (PA) and anterior-to-posterior (AP)  
14 current single-pulse TMS assessing corticospinal excitability ( $PA_{1mV}$ ;  $AP_{1mV}$ ;  $PA_{0.5mV}$ , early I-  
15 wave;  $AP_{0.5mV}$ , late I-wave). Although  $PA_{1mV}$  did not change post-intervention ( $P = 0.628$ ),  
16 PMd iTBS-M1 iTBS disrupted the expected facilitation of  $AP_{1mV}$  (to M1 iTBS in isolation) in  
17 young and older adults ( $P = 0.002$ ). Similarly, PMd iTBS-M1 iTBS disrupted  $PA_{0.5mV}$   
18 facilitation in young and older adults ( $P = 0.030$ ), whereas  $AP_{0.5mV}$  facilitation was not  
19 affected in either group ( $P = 0.218$ ). This suggests that while PMd specifically influences the  
20 plasticity of early I-wave circuits, this communication is preserved in older adults.

21 **Keywords:** Transcranial magnetic stimulation, ageing, dorsal premotor cortex,  
22 neuroplasticity

## 24 **Introduction**

25 One of the universal effects of ageing is widespread deficits in motor function. Although  
26 these deficits occur at all levels of the motor system, the structural, functional, and  
27 biochemical changes within the brain are important (Seidler *et al.*, 2010). In particular,  
28 alterations to the ability of the brain's motor system to continuously modify its structure and  
29 function are a critical factor. Termed neuroplasticity, this process is initially mediated by  
30 changes in the strength of synaptic communication with long-term potentiation (LTP) and  
31 depression (LTD), and underpins the ability to learn new motor skills (Buonomano &  
32 Merzenich, 1998; Sanes & Donoghue, 2000). While the capacity for neuroplastic change is  
33 present across the lifespan, some studies using non-invasive brain stimulation (NIBS) show  
34 reduced plasticity in older adults (Müller-Dahlhaus *et al.*, 2008; Fathi *et al.*, 2010; Todd *et*  
35 *al.*, 2010; Freitas *et al.*, 2011). This reduced plasticity may contribute to the motor deficits  
36 that limit the ability of older adults to perform essential activities of daily life. However, the  
37 neurophysiological mechanisms underpinning these changes with advancing age remain  
38 unclear.

39 Transcranial magnetic stimulation (TMS) is a type of NIBS that allows investigation of  
40 specific neuronal networks within the motor system with high temporal resolution.  
41 Application of TMS over primary motor cortex (M1) produces a complex series of  
42 descending volleys within corticospinal neurons that summate at the spinal cord, resulting in  
43 a motor evoked potential (MEP) in targeted muscles (Di Lazzaro *et al.*, 1998; Rossini *et al.*,  
44 2015). The first of these waves likely represent direct activation of corticospinal neurons,  
45 whereas subsequent waves are thought to reflect the indirect activation of interneuronal  
46 inputs to the corticospinal neurons (Di Lazzaro *et al.*, 2012; Ziemann, 2020). These responses  
47 are referred to as indirect (I) waves and are named early ( $I_1$ ) or late ( $I_2$ ,  $I_3$ ) based on the order

48 of their appearance, which occurs with a periodicity of ~1.5 ms (Di Lazzaro *et al.*, 2012;  
49 Ziemann, 2020). Early and late I-waves can be preferentially recruited by applying low-  
50 intensity single-pulse TMS with different current directions (Sakai *et al.*, 1997; Di Lazzaro *et al.*  
51 *al.*, 2001; Ni *et al.*, 2010). For example, a posterior-to-anterior (PA) current (relative to the  
52 central sulcus) preferentially recruits early I-waves, whereas an anterior-to-posterior (AP)  
53 current preferentially recruits late I-waves (Sakai *et al.*, 1997; Di Lazzaro *et al.*, 2001; Ni *et al.*  
54 *al.*, 2010). Using these measures, previous work has shown that the ability to recruit late I-  
55 waves predicts the response to plasticity-inducing TMS paradigms over M1 (Hamada *et al.*,  
56 2013; Wiethoff *et al.*, 2014) and that the late I-waves are behaviourally relevant to the  
57 acquisition of fine motor skills (Hamada *et al.*, 2014).

58 I-wave circuits are also involved in mediating the communication between other motor nodes  
59 and M1 (Groppa *et al.*, 2012; Volz *et al.*, 2015; Spampinato *et al.*, 2020; Opie *et al.*, 2022;  
60 Casarotto *et al.*, 2023), which form a wider network that influences M1 plasticity and  
61 learning (Huang *et al.*, 2018; Liao *et al.*, 2022). In particular, the dorsal premotor cortex  
62 (PMd) facilitates the planning, prediction, and correction of movements during motor  
63 learning by updating the activity of M1 (Chouinard *et al.*, 2005; Nowak *et al.*, 2009; Parikh &  
64 Santello, 2017). Previous studies have demonstrated that the application of repetitive TMS  
65 (rTMS) techniques (such as theta burst stimulation; TBS) over PMd is able to modify M1  
66 excitability, plasticity, and motor skill acquisition (Huang *et al.*, 2018; Meng *et al.*, 2020).  
67 Furthermore, while PMd influences both early and late I-wave excitability (Liao *et al.*, 2023),  
68 there is a stronger effect on the late I-waves (Volz *et al.*, 2015; Aberra *et al.*, 2020). Taken  
69 together, it is likely that the influence of late I-waves on M1 plasticity reflects inputs from  
70 PMd.

71 Given the role of late I-wave circuits in mediating PMd-M1 communication, changes in late  
72 I-wave activity may affect the influence of PMd on M1 plasticity. In particular, late I-wave  
73 activity is known to be altered with advancing age (Opie *et al.*, 2018). Age-related changes in  
74 I-wave excitability have been investigated using the paired-pulse TMS protocol short  
75 intracortical facilitation (SICF) (Opie *et al.*, 2018), which revealed reduced I-wave  
76 excitability and a specific delay in the temporal characteristics of the late I-waves in older  
77 adults (Opie *et al.*, 2018). Importantly, this delay influences NIBS-induced plasticity and is  
78 associated with specific aspects of motor behaviour in older adults (Opie *et al.*, 2018; Opie *et*  
79 *al.*, 2020). In addition, it is also known that PMd-M1 effective connectivity (Ni *et al.*, 2015)  
80 and direct PMd modulation of early I-waves within M1 is reduced in older adults (Liao *et al.*,  
81 2023). Consequently, it is possible that the influence of PMd on M1 plasticity is altered with  
82 advancing age, but this remains to be tested.

83 The purpose of the present study was, therefore, to investigate the influence of PMd on the  
84 plasticity of early and late I-wave circuits in M1 of young and older adults. We applied  
85 intermittent TBS (iTBS) over PMd in young and older participants and assessed how this  
86 influenced the neuroplastic response of M1 to iTBS. Different I-wave circuits were assessed  
87 by varying the direction of current used to apply TMS over M1. Although we expected iTBS  
88 over PMd to selectively modulate the plasticity of late I-wave circuits, we hypothesised that  
89 the effect of PMd on M1 plasticity would be weaker in older adults, given the likely  
90 alterations in late I-wave activity and PMd-M1 connectivity with advancing age.

91

92

93

## 94 **Methods**

### 95 *Sample Size and Participants*

96 15 young (mean  $\pm$  standard deviation,  $24.7 \pm 5.0$  years; range , 19-36 years) and 15 older  
97 adults ( $67.2 \pm 5.4$  years; 61-78 years) were recruited for the study via advertisements placed  
98 on notice boards within The University of Adelaide and the wider community, in addition to  
99 social media platforms. Applicants for the study were excluded if they had a history of  
100 psychiatric or neurological disease, current use of medication that affect the central nervous  
101 system, pregnancy, metal implants, or left handedness, as assessed by a standard TMS  
102 screening questionnaire (Rossi *et al.*, 2011). The experiment was conducted in accordance  
103 with the Declaration of Helsinki and was approved by The University of Adelaide Human  
104 research Ethics Committee (H-026-2008). Subjects provided written, informed consent prior  
105 to participation.

### 106 *Experimental Arrangement*

107 All participants attended two experimental sessions where iTBS or sham iTBS was applied to  
108 PMd, followed 30 minutes later by plasticity induction within M1 via iTBS (PMd iTBS-M1  
109 iTBS, PMd sham-M1 iTBS). The same experimental protocol was used in both sessions Fig.  
110 1), with the order of intervention randomised between participants, and a washout period of at  
111 least 1 week was used between sessions. As diurnal variations in cortisol are known to  
112 influence the neuroplastic response to TMS (Sale *et al.*, 2008), all sessions were completed  
113 between 11 am and 5 pm at approximately the same time of day for each participant.  
114 During each experimental session, participants were seated in a comfortable chair with their  
115 hands resting and relaxed. Surface electromyography (EMG) was recorded from the first  
116 dorsal interosseous (FDI) of the right hand using two Ag-AgCl electrodes arranged in a belly-

117 tendon montage on the skin above the muscle, with a third electrode attached above the  
118 styloid process of the right ulnar used to ground the electrodes. EMG signals were amplified  
119 (300x) and filtered (band-pass 20 Hz – 1 kHz) using a CED 1902 signal conditioner  
120 (Cambridge Electronic Design, Cambridge, UK) before being digitised at 2 kHz using a CED  
121 1401 analogue-to-digital converter. Signal noise associated with mains power was removed  
122 using a Humbug mains noise eliminator (Quest Scientific, North Vancouver, Canada). EMG  
123 signals were stored on a PC for offline analysis. Real-time EMG signals were displayed on an  
124 oscilloscope placed in front of the participant to facilitate muscle relaxation during the  
125 experiment.

## 126 *Experimental Procedures*

127 *Transcranial magnetic stimulation (TMS)*. A branding iron coil connected to two Magstim  
128 200<sup>2</sup> magnetic stimulators (Magstim, Whitland, UK) via a BiStim unit was used to apply  
129 TMS to left M1. The coil was held tangentially to the scalp at an angle of 45° to the sagittal  
130 plane, inducing a posterior-to-anterior (PA) current relative to the central sulcus. The M1  
131 hotspot was identified as the location producing the largest and most consistent MEPs within  
132 the relaxed FDI muscle of the right hand (Rossini *et al.*, 2015). This location was marked on  
133 the scalp for reference and continuously monitored throughout each experimental session. All  
134 baseline, post-PMd iTBS, and post-M1 iTBS (5 minutes, 30 minutes) TMS was applied at a  
135 rate of 0.2 Hz, with a 10% jitter between trials to avoid anticipation of the stimulus.

136 Resting motor threshold (RMT) was recorded as the lowest stimulus intensity producing an  
137 MEP amplitude  $\geq 50 \mu\text{V}$  in at least 5 out of 10 trials during relaxation of the right FDI. RMT  
138 was assessed at the beginning of each experimental session and expressed as a percentage of  
139 maximum stimulator output (% MSO) (Rossini *et al.*, 2015). Active motor threshold (AMT)  
140 was then assessed, defined as the lowest % MSO producing an MEP amplitude  $\geq 200 \mu\text{V}$  in



141 at least 5 out of 10 trials during concurrent low-level activation (~10% voluntary activation)  
142 of the right FDI (Hamada *et al.*, 2013). These measures were then repeated using the AP  
143 current by rotating the coil 180°. Then, the stimulus intensities producing a standard MEP  
144 amplitude approximating 1 mV ( $MEP_{1mV}$ ;  $PA_{1mV}$ ,  $AP_{1mV}$ ), in addition to an MEP amplitude  
145 approximating 0.5 mV ( $MEP_{0.5mV}$ ;  $PA_{0.5mV}$ ,  $AP_{0.5mV}$ ), when averaged over 20 trials, were  
146 identified. The same intensities were then applied following PMd iTBS and following M1  
147 iTBS to assess changes in corticospinal excitability.

148 *I-wave recruitment.* To investigate the ability to recruit I-waves, the onset latencies of PA  
149 (early) and AP (late) MEPs were assessed relative to the MEP onset generated by direct  
150 activation of corticospinal neurons using a lateral-to-medial (LM) current (Hamada *et al.*,  
151 2013). A block of 15 MEP trials in the active FDI was recorded for 110% of  $AMT_{PA}$  and  
152  $AMT_{AP}$ , in addition to 150%  $AMT_{LM}$  (Hamada *et al.*, 2013). If 150%  $AMT_{LM}$  exceeded 100%  
153 MSO, 100% MSO was used, or if 150%  $AMT_{LM}$  was below 50% MSO, 50% MSO was used  
154 (Hamada *et al.*, 2013). The difference in mean onset latencies between PA and LM (PA-LM)  
155 and AP and LM (AP-LM) were calculated as measures of early and late I-wave recruitment  
156 efficiency, respectively (Hamada *et al.*, 2013). In an attempt to reduce the confounding  
157 influence of muscle contraction on neuroplasticity induction (Huang *et al.*, 2008;  
158 Thirugnanasambandam *et al.*, 2011; Goldsworthy *et al.*, 2015), these measures were recorded  
159 at the start and at the end of the experimental session, at least 45 minutes apart from the  
160 plasticity induction of PMd and M1.

161 *Theta burst stimulation (TBS).* Intermittent theta burst stimulation (iTBS) was delivered over  
162 left PMd and left M1 using a Magstim Super-rapid stimulator (Magstim, Whitland, UK),  
163 connected to an air-cooled figure-of-eight coil. The coil was held tangentially to the scalp, at  
164 an angle of 45° to the sagittal plane, with the handle pointing backwards and laterally,

165 inducing a biphasic pulse with an initial PA current followed by an AP return current (Suppa  
166 *et al.*, 2008). In accordance with existing literature, iTBS consisted of bursts of three pulses  
167 given at a frequency of 50 Hz. Each burst was repeated at 5 Hz for 2 s, and repeated every 8 s  
168 for 20 cycles, totalling 600 pulses (Huang *et al.*, 2005; Huang *et al.*, 2008; Huang *et al.*,  
169 2018; Meng *et al.*, 2020). The location of left PMd was defined as 8% of the distance  
170 between the nasion andinion (approximately 2.5 – 3 cm) anterior to the M1 hotspot,  
171 consistent with previous work (Münchau *et al.*, 2002; Koch *et al.*, 2007; Huang *et al.*, 2018;  
172 Meng *et al.*, 2020). The location of both the M1 hotspot and left PMd site were logged  
173 relative to the MNI-ICBM152 template usingBrainsight neuronavigation (Rogue Research,  
174 Montreal, Quebec, Canada). These locations were then used to guide the assessment of RMT  
175 (RMT<sub>Rapid</sub>) over M1 with the Magstim Super-rapid stimulator, in addition to the application  
176 of iTBS over left PMd and M1 at 70% RMT<sub>Rapid</sub>.

177 Sham iTBS to left PMd was delivered using a sham figure-of-eight coil (replicating the coil  
178 click), with a bar electrode connected to a constant current stimulator (Digitimer,  
179 Hertfordshire, UK) placed underneath the coil delivering electrical stimulation (1.5 mA) to  
180 the scalp in order to mimic the pulse sensation. Following either intervention, participants  
181 provided answers to a visual analogue scale (VAS) questionnaire indexing the degree of  
182 discomfort, muscle activation, and localisation of scalp sensation during PMd iTBS.

### 183 *Data Analysis*

184 Visual inspection of EMG data was completed offline, with any trials obtained from the  
185 resting muscle having EMG activity exceeding 25  $\mu$ V in the 100 ms prior to stimulus  
186 application excluded from analysis (approximately 6.8% removed). The amplitude of MEPs  
187 obtained from resting muscle recordings was measured peak-to-peak and expressed in mV.  
188 The MEP onset latencies obtained from active muscle recordings was assessed with a semi-

189 automated process using a custom script within the Signal program (v 6.02, Cambridge  
190 Electronic Design) and expressed in ms. MEP latency was recorded as the period from  
191 stimulus application to the resumption of voluntary EMG activity. This was defined as the  
192 point at which post-stimulus EMG amplitude exceeded the mean EMG amplitude recorded  
193 within the 100 ms pre-stimulus, plus 2 standard deviations. MEP onset latencies were  
194 averaged over individual trials within each subject and coil orientation. Within each  
195 participant, the mean LM MEP latencies were subtracted from the mean PA and AP MEP  
196 latencies to determine PA-LM and AP-LM MEP latency differences. Following TBS  
197 interventions, changes in MEP latency differences were quantified by expressing the post-  
198 intervention responses as a percentage of the baseline responses. Changes in MEP amplitude  
199 due to PMd iTBS were quantified by expressing post-PMd iTBS responses as a percentage of  
200 baseline MEP amplitude. For post-M1 iTBS, changes in MEP amplitude were quantified by  
201 expressing post-M1 iTBS responses as a percentage of post-PMd iTBS responses.

## 202 *Statistical Analysis*

203 Visual inspection and Kolmogorov-Smirnov tests of the data residuals revealed non-normal,  
204 positively-skewed distributions for all TMS data. Consequently, generalised linear mixed  
205 models (GLMM's), which can account for non-normal distributions (Lo & Andrews, 2015;  
206 Puri & Hinder, 2022), were used to perform all statistical analyses. Each model assessing  
207 MEP amplitude included single trial data with repeated measures and was fitted with Gamma  
208 distributions (Puri & Hinder, 2022), with all random subject effects included (intercepts and  
209 slopes) (Barr *et al.*, 2013). Identity link functions were used for baseline MEP amplitude and  
210 latency differences while log link functions were used for post-iTBS normalised MEP  
211 amplitude and latency differences (Lo & Andrews, 2015; Puri & Hinder, 2022). To optimise  
212 model fit, we tested different covariance structures and the structure providing the best fit  
213 (assess with the Bayesian Schwartz Criterion; BIC) within a model that was able to converge

214 was used in the final model. Two-factor GLMMs were used to compare effects of session  
215 (PMd iTBS-M1 iTBS, PMd sham-M1 iTBS) and age (young, older) at baseline in four  
216 separate models for  $PA_{0.5mV}$ ,  $AP_{0.5mV}$ ,  $PA_{1mV}$ , and  $AP_{1mV}$ . A three-factor model was used to  
217 compare the effects of session, age, and orientation (PA, AP) on PA-LM and AP-LM latency  
218 differences at baseline.

219 Changes in corticospinal excitability following PMd iTBS were investigated by assessing  
220 effects of session and age in four separate models for baseline-normalised  $PA_{1mV}$ ,  $AP_{1mV}$ ,  
221  $PA_{0.5mV}$ , and  $AP_{0.5mV}$  MEP amplitude. Changes in corticospinal excitability following PMd  
222 iTBS-M1 iTBS and PMd sham-M1 iTBS were investigated by assessing effects of session,  
223 time (5 minutes, 30 minutes) and age in four separate models for  $PA_{1mV}$ ,  $AP_{1mV}$ ,  $PA_{0.5mV}$ , and  
224  $AP_{0.5mV}$  MEP amplitudes normalised to the mean post-PMd iTBS MEP amplitudes. Changes  
225 in I-wave recruitment following the intervention were investigated by assessing effects of  
226 session, age, and coil orientation on baseline-normalised average PA-LM and AP-LM latency  
227 differences. For all models, investigation of main effects and interactions were performed  
228 using custom contrasts with Bonferroni correction, and significance was set at  $P < 0.05$ . Data  
229 for all models are presented as estimated marginal means (EMMs) and 95% confidence  
230 intervals (95% CI), whereas pairwise comparisons are presented as the estimated mean  
231 difference (EMD) and 95% CI for the estimate.

232 Furthermore, we used Spearman's rank-order correlation to assess the relationship between  
233 different variables. Specifically, baseline MEP latency differences were correlated with  
234 changes in corticospinal excitability immediately following PMd iTBS to investigate if the  
235 ability to recruit I-waves is related to changes in corticospinal excitability. Baseline MEP  
236 latency differences were also correlated with changes in corticospinal excitability and I-wave  
237 recruitment during the PMd sham-M1 iTBS session to investigate if the ability to recruit I-

238 waves is related to changes in corticospinal excitability and I-wave latency differences  
239 following M1 iTBS. In addition, individual ages were tested against changes in corticospinal  
240 excitability immediately following PMd iTBS (during PMd iTBS-M1 iTBS) and PMd sham-  
241 M1 iTBS to investigate if age is related to changes in corticospinal excitability. Changes in  
242 corticospinal excitability following PMd iTBS were also correlated with changes in  
243 corticospinal excitability following M1 iTBS (during PMd iTBS-M1 iTBS) to investigate if  
244 direct PMd modulation of M1 excitability is related to changes in M1 plasticity. Correlations  
245 are presented as Spearman's  $\rho$  with false discovery rate-adjusted  $P$ -value of 0.05 following  
246 the Benjamini-Hochberg procedure. Lastly, differences in the perception of discomfort,  
247 extent of FDI activation, and localisation of stimulus during PMd iTBS and PMd sham were  
248 investigated by comparing VAS responses using paired t-tests with Bonferroni correction ( $P$   
249  $< 0.0167$ ), with data presented as mean  $\pm$  standard deviation.

## 250 **Results**

251 All participants completed both experimental sessions without adverse reactions. We were  
252 unable to record  $PA_{1mV}$  in one older male participant,  $AP_{0.5mV}$  in two older participants (1  
253 female, 1 male), and  $AP_{1mV}$  in five participants (1 young female; 3 older females, 1 older  
254 male) due to high thresholds of activation (mean  $RMT_{PA} = 80.0\%$  MSO, mean  $RMT_{AP} =$   
255  $73.0\%$  MSO). Baseline stimulation intensities are presented in Table 1. Stimulation  
256 intensities for  $AP_{1mV}$  differed between sessions ( $F_{1,46} = 4.17$ ,  $P = 0.047$ ), with *post-hoc*  
257 comparisons showing higher intensities for the iTBS session relative to sham session (EMD =  
258  $2.3\%$  MSO [0.0, 4.6],  $P = 0.047$ ). There were no other main effects or interactions for all  
259 other baseline stimulation intensities (all  $P > 0.05$ ).

260 Baseline MEP amplitudes for corticospinal excitability and MEP latency differences are  
261 shown in Table 2. For  $PA_{1mV}$  MEP amplitude, there was an interaction between session and

262 age ( $F_{1,1121} = 4.194$ ,  $P = 0.041$ ), with *post-hoc* comparisons revealing larger MEP amplitude  
263 for young participants relative to older participants (EMD = 0.14 mV [0.02, 0.26],  $P =$   
264 0.024). For baseline MEP latency differences, responses differed between coil orientations  
265 ( $F_{1,112} = 165.20$ ,  $P < 0.0001$ ), where PA-LM latencies were shorter than AP-LM latencies  
266 (EMD = 1.95 ms [1.65, 2.25],  $P < 0.0001$ ), as expected. There were no main effects or  
267 interactions for all other baseline MEP amplitudes or MEP latency differences (all  $P > 0.05$ ).

### 268 **Changes in corticospinal excitability following PMd iTBS**

269 The participants' perceptions of PMd iTBS and PMd sham are shown in Table 3. While there  
270 were no differences between sessions in the extent of discomfort ( $t_{29} = 0.25$ ,  $P = 0.804$ ) or  
271 FDI activation ( $t_{29} = 0.10$ ,  $P = 0.918$ ) experienced by the participants, the locality of  
272 stimulation differed ( $t_{29} = 3.98$ ,  $P = 0.004$ ), with the sensation of iTBS perceived as more  
273 widespread relative to electrical scalp stimulation in sham.

274 Changes in MEP<sub>1mV</sub> and MEP<sub>0.5mV</sub> measures of corticospinal excitability following PMd  
275 iTBS are shown in Figure 2. PA<sub>1mV</sub> MEP amplitude did not differ between sessions ( $F_{1,1114} =$   
276 0.90,  $P = 0.343$ ; Fig. 2A) or age groups ( $F_{1,1114} = 0.12$ ,  $P = 0.726$ ), and there was no  
277 interaction between factors ( $F_{1,1114} = 2.41$ ,  $P = 0.121$ ). AP<sub>1mV</sub> MEP amplitude did not vary  
278 between sessions ( $F_{1,996} = 2.33$ ,  $P = 0.127$ ; Fig. 2B) or age groups ( $F_{1,996} = 1.31$ ,  $P = 0.252$ ),  
279 and there was no interaction between factors ( $F_{1,996} = 0.51$ ,  $P = 0.476$ ). In contrast, while  
280 PA<sub>0.5mV</sub> MEP amplitude did not differ between age groups ( $F_{1,1152} = 0.11$ ,  $P = 0.740$ ),  
281 responses varied between sessions ( $F_{1,1152} = 4.23$ ,  $P = 0.040$ ; Fig. 2C), with increased MEP  
282 amplitude following iTBS relative to sham (EMD = 26.3% [0.7, 51.9],  $P = 0.044$ ). There was  
283 no interaction between factors ( $F_{1,1152} = 0.11$ ,  $P = 0.741$ ). AP<sub>0.5mV</sub> MEP amplitude did not  
284 vary between sessions ( $F_{1,1073} = 1.04$ ,  $P = 0.308$ ; Fig. 2D) or age groups ( $F_{1,1073} = 2.80$ ,  $P =$   
285 0.095), and there was no interaction between factors ( $F_{1,1073} = 1.03$ ,  $P = 0.310$ ).

## 286 **Changes in corticospinal excitability and I-wave recruitment following M1 iTBS.**

### 287 *Corticospinal excitability*

288 Changes in MEP<sub>1mV</sub> measures of corticospinal excitability following PMd iTBS-M1 iTBS  
289 and PMd sham-M1 iTBS are presented in Figure 3. PA<sub>1mV</sub> MEP amplitudes (Fig. 3A) did not  
290 vary between sessions ( $F_{1,2234} = 2.20$ ,  $P = 0.138$ ), time points ( $F_{1,2234} = 0.15$ ,  $P = 0.696$ ), or  
291 age groups ( $F_{1,2234} = 1.17$ ,  $P = 0.279$ ), and there were no interactions between factors (all  $P >$   
292  $0.05$ ). AP<sub>1mV</sub> MEP amplitudes also did not differ between sessions ( $F_{1,1922} = 1.16$ ,  $P = 0.281$ ),  
293 time points ( $F_{1,1922} = 1.15$ ,  $P = 0.283$ ), or age groups ( $F_{1,1922} = 1.70$ ,  $P = 0.193$ ), but there was  
294 an interaction between session and time ( $F_{1,1922} = 10.02$ ,  $P = 0.002$ ; Fig 3B). *Post-hoc*  
295 comparisons showed that MEP amplitudes following PMd sham-M1 iTBS was increased at 5  
296 minutes compared to PMd iTBS-M1 iTBS (EMD = 30.4% [7.5, 53.3],  $P = 0.009$ ), and  
297 compared to 30 minutes (EMD = 30.4% [7.4, 53.3],  $P = 0.009$ ). There were no other  
298 interactions (all  $P > 0.05$ ).

299 Changes in MEP<sub>0.5mV</sub> measures of corticospinal excitability are presented in Figure 4. While  
300 PA<sub>0.5mV</sub> MEP amplitudes did not differ between time points ( $F_{1,2311} = 0.03$ ,  $P = 0.874$ ) or age  
301 groups ( $F_{1,2311} = 0.17$ ,  $P = 0.678$ ), responses varied between sessions ( $F_{1,2311} = 17.4$ ,  $P <$   
302  $0.05$ ), with increased MEP amplitudes following PMd sham-M1 iTBS (EMD = 34.3% [17.5,  
303 51.0],  $P < 0.05$ ). Furthermore, there was an interaction between session, time, and age ( $F_{1,2311}$   
304  $= 4.71$ ,  $P = 0.030$ ; Fig. 4A). *Post-hoc* analysis revealed increased MEP amplitudes at 30  
305 minutes for young adults (EMD = 50.7% [20.1, 81.3],  $P = 0.001$ ), and at 5 (EMD = 43.0%  
306 [13.9, 72.0],  $P = 0.004$ ) and 30 minutes (EMD = 32.0% [3.6, 60.4],  $P = 0.027$ ) for older  
307 adults following PMd sham-M1 iTBS compared to PMd iTBS-M1 iTBS. For AP<sub>0.5mV</sub>, MEP  
308 amplitude did not vary between sessions ( $F_{1,2141} = 0.13$ ,  $P = 0.723$ ) or age groups ( $F_{1,2141} =$   
309  $3.12$ ,  $P = 0.077$ ) (Fig. 4B). However, responses differed between time points ( $F_{1,2141} = 5.91$ ,

310  $P = 0.015$ ; Fig. 4C), with *post-hoc* analysis revealing that MEP amplitude was increased at 5  
311 minutes relative to 30 minutes post-M1 iTBS (EMD = 22.0% [3.9, 40.0],  $P = 0.017$ ). There  
312 were no interactions between factors (all  $P > 0.05$ ).

### 313 *I-wave recruitment*

314 There was no difference between sessions ( $F_{1,112} = 0.72$ ,  $P = 0.399$ ), coil orientations ( $F_{1,112} =$   
315  $0.09$ ,  $P = 0.766$ ), or age groups ( $F_{1,112} = 0.38$ ,  $P = 0.538$ ), and there were no interactions  
316 between factors (all  $P > 0.05$ ).

### 317 *Correlation analyses*

318 Baseline PA-LM and AP-LM latencies were not related to changes in single-pulse measures  
319 of corticospinal excitability ( $PA_{1mV}$ ,  $AP_{1mV}$ ,  $PA_{0.5mV}$ ,  $AP_{0.5mV}$ ) following PMd iTBS (all  $P >$   
320  $0.05$ ). Baseline PA-LM and AP-LM latencies were not related to changes in single-pulse  
321 measures of corticospinal excitability or changes in PA-LM and AP-LM latencies following  
322 PMd sham-M1 iTBS (all  $P > 0.05$ ). Furthermore, individual age did not predict changes in  
323 single-pulse measures of corticospinal excitability following PMd iTBS or corticospinal  
324 excitability and MEP latency differences following PMd sham-M1 iTBS (all  $P > 0.05$ ). In  
325 contrast, while changes in  $AP_{1mV}$  MEP amplitude following PMd iTBS were not related to  
326 changes in  $AP_{1mV}$  responses following M1 iTBS ( $\rho = -0.361$ ,  $P = 0.076$ ; Fig. 5B), changes in  
327  $PA_{1mV}$ ,  $PA_{0.5mV}$ , and  $AP_{0.5mV}$  MEP amplitude following PMd iTBS were negatively correlated  
328 with changes in  $PA_{1mV}$  ( $\rho = 0.577$ ,  $P = 0.001$ ; Fig. 5A),  $PA_{0.5mV}$  ( $\rho = -0.616$ ,  $P = 0.0003$ ; Fig.  
329 5C), and  $AP_{0.5mV}$  ( $\rho = -0.551$ ,  $P = 0.002$ ; Fig. 5D) responses following M1 iTBS,  
330 respectively.

331



## 332 **Discussion**

333 In the present study, we investigated the influence of PMd on the plasticity of early and late I-  
334 wave-generating circuits in M1 of young and older adults. This was achieved by applying  
335 PMd iTBS as a priming intervention to modify the neuroplastic response of M1 to subsequent  
336 iTBS (PMd iTBS-M1 iTBS, PMd sham-M1 iTBS). We measured changes in corticospinal  
337 excitability ( $PA_{1mV}$ ,  $AP_{1mV}$ ,  $PA_{0.5mV}$ ,  $AP_{0.5mV}$ ) and I-wave recruitment (PA-LM latency, AP-  
338 LM latency) following the intervention. The findings show that PMd iTBS specifically  
339 modulated the excitability of the early I-wave circuits in both young and older adults.  
340 Moreover, PMd iTBS disrupted the neuroplastic response of the early I-wave circuits to M1  
341 iTBS in both young and older adults, whereas the neuroplastic response of the late I-wave  
342 circuits was unaffected in both age groups.

### 343 **PMd influence on corticospinal excitability in young and older adults**

344 Previous work has reported that application of iTBS to PMd facilitates  $PA_{1mV}$  measures of  
345 M1 corticospinal excitability in young adults by ~30%, which is thought to stem from the  
346 induction of LTP-like effects within PMd, resulting in increased excitability within M1  
347 (Meng *et al.*, 2020). Furthermore, we have demonstrated previously that this effect on  $PA_{1mV}$   
348 is preserved with ageing and extends to  $AP_{1mV}$  measures of corticospinal excitability (Liao *et*  
349 *al.*, 2023). The absence of any changes in  $PA_{1mV}$  or  $AP_{1mV}$  within the present study is  
350 therefore inconsistent with these previous findings. However, inter- and intraindividual  
351 variability in the changes in M1 excitability following TBS is well-documented (Hamada *et*  
352 *al.*, 2013; Corp *et al.*, 2020; Guerra *et al.*, 2020). In particular, there is some variability in the  
353 time course of facilitation following PMd iTBS. For example, one study reported that the  
354 facilitation of MEP amplitude only occurred at 15 minutes (Meng *et al.*, 2020), whereas we  
355 previously demonstrated facilitation of MEP amplitude that persisted from 5 to 40 minutes

356 following PMd iTBS (Liao *et al.*, 2023). Consequently, our decision to record MEPs at 5  
357 minutes post-PMd iTBS may have limited the ability to detect changes in corticospinal  
358 excitability due to the priming intervention.

359 Although  $PA_{1mV}$  and  $AP_{1mV}$  MEP amplitude were not modulated following PMd iTBS,  
360  $PA_{0.5mV}$  was facilitated (by ~30%) for both young and older adults. The conventional  
361 interpretation of how TMS intensity and current direction influence I-wave recruitment  
362 suggests that low-intensity PA TMS preferentially recruits early I-waves, whereas low-  
363 intensity AP TMS preferentially recruits late I-waves (Hamada *et al.*, 2013), with either  
364 current direction able to recruit both I-waves as the stimulation intensity is increased (Di  
365 Lazzaro *et al.*, 2001; Di Lazzaro *et al.*, 2003). We therefore applied single-pulse TMS at  
366 relatively lower intensities compared to  $MEP_{1mV}$  ( $PA_{0.5mV}$ ,  $AP_{0.5mV}$ ), where  $PA_{0.5mV}$  is likely  
367 more selective for activation of the early I-waves, while  $AP_{0.5mV}$  is likely more selective for  
368 the late I-waves (Opie *et al.*, 2022). Given that we previously reported potentiation of both  
369  $PA_{0.5mV}$  and  $AP_{0.5mV}$  (by ~50-100%) following PMd iTBS (Liao *et al.*, 2023), the increase in  
370  $PA_{0.5mV}$  within the present study suggests that the effect of PMd iTBS on early I-wave  
371 excitability may be immediate and more consistent. Importantly, previous work has shown  
372 that PMd iTBS applied as it was in the current study is unlikely to have activated M1 directly.  
373 Specifically, Huang and colleagues (2009) assessed the intensity required to activate M1  
374 when TMS was applied over PMd, and showed that 80% of this (matching the level applied  
375 during iTBS) applied to M1 does not influence M1 excitability (Huang *et al.*, 2009). Given  
376 that we located PMd using similar methods (Huang *et al.*, 2009; Huang *et al.*, 2018; Meng *et*  
377 *al.*, 2020), it is therefore unlikely that PMd iTBS activated M1 directly in the present study.

378 Despite the present findings demonstrating that PMd iTBS increased early I-wave  
379 excitability, this effect was not different between young and older adults, suggesting that the

380 influence of PMd on early I-wave excitability may be preserved with ageing. This contrasts  
381 with our previous work, which specifically demonstrated weakened direct PMd modulation  
382 of early I-waves in older adults (Liao *et al.*, 2023). Given that both studies employed the  
383 same methods to assess changes in M1 excitability following PMd iTBS, participant factors  
384 such as genetics, pharmacology, aerobic exercise, and diet that are known to influence  
385 cortical plasticity (Ridding & Ziemann, 2010; Phillips, 2017) may have confounded the  
386 present findings. As the contributions of participant characteristics on PMd-M1  
387 communication were not examined in the present study, and the small sample sizes were not  
388 powered for such subanalyses, it will be important to characterise their involvement in future  
389 studies.

#### 390 **PMd influence on M1 plasticity in young and older adults**

391 Previous work in young participants demonstrated that applying continuous TBS (cTBS) to  
392 PMd disrupts the neuroplastic response of M1 to both iTBS and cTBS, assessed using  $PA_{1mV}$   
393 MEPs (Huang *et al.*, 2018). This demonstrated that LTP- and LTD-like effects within M1 can  
394 be modulated by PMd cTBS, which was thought to arise from heterosynaptic metaplastic  
395 effects, where the modulation of local synaptic plasticity within PMd affected subsequent  
396 changes in remote synapses (that were not initially activated) within M1 (Huang *et al.*, 2018).  
397 In the present study, we demonstrated that applying iTBS to PMd also disrupts the LTP-like  
398 effects of M1 iTBS for  $AP_{1mV}$  measures of corticospinal excitability. However, given that  
399 iTBS produces LTP-like effects while cTBS produces LTD-like effects, this disruption of  
400  $AP_{1mV}$  facilitation may stem from a different mechanism more consistent with homeostatic  
401 metaplasticity (Müller *et al.*, 2007; Todd *et al.*, 2009; Murakami *et al.*, 2012). Importantly,  
402 this response did not differ between young and older adults, suggesting that the influence of  
403 PMd on the plasticity of AP circuits within M1 is maintained with age.

404 Furthermore, PMd iTBS disrupted the effects of M1 iTBS on  $PA_{0.5mV}$  (early), but not  $AP_{0.5mV}$   
405 (late) circuits. This suggests that the influence of PMd on M1 plasticity is specific to the early  
406 I-waves. Although this may appear counterintuitive to our  $AP_{1mV}$  findings, this can be  
407 explained by the possibility that the higher stimulus intensity required to record  $AP_{1mV}$   
408 resulted in mixed recruitment of early and late I-waves, but that changes in  $AP_{1mV}$  were  
409 driven specifically by the early I-waves (Di Lazzaro *et al.*, 2001; Di Lazzaro *et al.*, 2003;  
410 Liao *et al.*, 2022). This is complemented by the correlation analysis results demonstrating that  
411 larger facilitation of  $PA_{0.5mV}$  post-PMd iTBS is correlated with smaller facilitation of  $PA_{0.5mV}$   
412 post-M1 iTBS, suggesting that this homeostatic metaplastic effect is likely related to the early  
413 I-wave circuits. While a similar correlation was also shown for  $PA_{1mV}$  and  $AP_{0.5mV}$ , PMd  
414 iTBS-M1 iTBS did not disrupt the potentiation of these measures when compared to PMd  
415 sham-M1 iTBS session. It is possible that the higher stimulus intensities required for  $PA_{1mV}$   
416 and  $AP_{0.5mV}$  (relative to  $PA_{0.5mV}$ ) may have also resulted in mixed recruitment of early and  
417 late I-waves (Liao *et al.*, 2022). In particular, given that there is growing evidence to suggest  
418 that PA and AP TMS can activate distinct populations of early and late I-waves (i.e., PA- and  
419 AP-sensitive early and late I-waves) (Spampinato *et al.*, 2020; Opie & Semmler, 2021),  
420  $PA_{1mV}$  and  $AP_{0.5mV}$  may have recruited other I-wave circuits that were less sensitive to the  
421 modulatory effects of iTBS. However, this will need to be clarified in future research using  
422 techniques that are more selective to these different I-waves, such as modifying the TMS  
423 pulse width (Hannah & Rothwell, 2017). Despite this, we provide new evidence that PMd  
424 iTBS specifically modulates M1 plasticity of early I-wave circuits recruited by AP  
425 stimulation.

426 While M1 iTBS in isolation (PMd sham-M1 iTBS) potentiated  $PA_{0.5mV}$  responses (compared  
427 with PMd iTBS-M1 iTBS) in both age groups, the timing of this response varied between  
428 groups. Whereas differences between sham and real PMd iTBS sessions were immediate for

429 older adults, they were only apparent after 30 minutes in young adults. Given that M1 iTBS  
430 has not been shown to differentially modulate corticospinal excitability in young and older  
431 adults (Di Lazzaro *et al.*, 2008; Young-Bernier *et al.*, 2014; Dickins *et al.*, 2015; Opie *et al.*,  
432 2017), this outcome seems unlikely to reflect effects of age within M1. An alternative  
433 explanation could be that the modulatory effects of PMd iTBS differed between groups, with  
434 younger adults having a stronger response that was more resistant to the subsequent effects of  
435 M1 iTBS. This is supported by the amplitude of  $PA_{0.5mV}$  being reduced 5 minutes after M1  
436 iTBS in older, but not young adults in the session involving real PMd iTBS (Fig. 4A).  
437 Although speculative, this outcome would be consistent with our previous finding that the  
438 influence of PMd iTBS on  $PA_{0.5mV}$  is reduced in older adults (Liao *et al.*, 2023). However,  
439 this speculation will require additional studies that more effectively characterise the time  
440 course of facilitation in young and older adults. For example, previous work investigating the  
441 effects of PMd cTBS on M1 neuroplastic response to iTBS or cTBS monitored changes in  
442 corticospinal excitability for two hours following PMd cTBS (during which excitability  
443 returned to baseline levels) before applying subsequent M1 iTBS or cTBS (Huang *et al.*,  
444 2018).

#### 445 **PMd and M1 influence on I-wave recruitment in young and older adults**

446 The ability to recruit both early and late I-waves can be investigated by comparing the  
447 latencies evoked by PA and AP TMS to the latencies of direct corticospinal activation (PA-  
448 LM, early; AP-LM, late) (Hamada *et al.*, 2013). The prototypical values for these measures  
449 reveal shorter PA-LM latencies (~1.5 ms) compared to AP-LM latencies (~3 ms), providing  
450 an index of early and late I-wave recruitment, respectively (Hamada *et al.*, 2013).  
451 Importantly, previous studies have shown that the ability to recruit late I-waves with AP TMS  
452 predicts the neuroplastic response of M1 to iTBS (Hamada *et al.*, 2013; Volz *et al.*, 2019),

453 with AP inputs thought to originate from PMd (Volz *et al.*, 2015; Aberra *et al.*, 2020). It has  
454 also been demonstrated that AP-LM latencies can be shortened using M1 iTBS, which was  
455 suggested to reflect the direct modulation of the late I-wave circuitry (Volz *et al.*, 2019).  
456 Although we also assessed changes in PA-LM and AP-LM latencies following PMd sham-  
457 M1 iTBS in the present study, the intervention failed to modulate the I-wave latencies. It is  
458 possible that changes in AP-LM latencies occur immediately following iTBS, as the MEP  
459 latency measures were recorded at least 45 minutes either side of PMd and M1 iTBS in order  
460 to avoid complications involving the effects of muscle activation on neuroplasticity responses  
461 (Huang *et al.*, 2008; Thirugnanasambandam *et al.*, 2011; Goldsworthy *et al.*, 2015).  
462 Consequently, the effects of M1 iTBS on I-wave latencies will have to be clarified in future  
463 studies.

464 Importantly, baseline I-wave recruitment was not correlated with changes in corticospinal  
465 excitability following M1 iTBS in isolation, in contrast to previous findings (Hamada *et al.*,  
466 2013; Volz *et al.*, 2019). While the difference between the present study and previous studies  
467 is that we included older participants, correlation analyses did not reveal any relationship  
468 between age and changes in corticospinal excitability following M1 iTBS. The variability in  
469 the present findings may therefore involve contributions from other factors. For example,  
470 recent work assessing variability of M1 iTBS has suggested that the ability of iTBS to engage  
471 neural oscillations in the  $\beta$  range (13-30 Hz) may be an important predictor of the  
472 neuroplastic response to iTBS (Leodori *et al.*, 2021). Enhancing premotor-M1  
473 communication using cortico-cortical paired associated stimulation (ccPAS) has been  
474 recently shown to improve the synchronisation of neural oscillations (which is thought to  
475 mediate neuronal communication and plasticity) in the  $\beta$  range (Trajkovic *et al.*, 2023).  
476 Further investigation involving these measures may therefore better characterise the

477 variability of iTBS, and may also have applications in understanding PMd-M1

478 communication.

479 In conclusion, the application of iTBS over PMd potentiated corticospinal excitability and

480 disrupted the effects of subsequent M1 iTBS. Specifically, our results show that PMd may

481 more consistently influence the excitability of early I-waves in young and older adults.

482 Importantly, we provide new evidence that PMd disrupts M1 plasticity of early I-wave

483 circuits in both age groups. It will therefore be useful in future studies to investigate how

484 PMd modulation of M1 plasticity influences different feature of motor skill learning in young

485 and older adults.

## 486 **Data Availability Statement**

487 Data from this study will be made available to qualified investigators upon reasonable request

488 to the corresponding author.

## 489 **Acknowledgements**

490 Support was provided by an Australian Research Council Discovery Projects Grant (grant

491 number DP200101009). GMO was supported by funding from the National Health and

492 Medical Research Council (APP1139723) and Australian Research Council (DE230100022).

493

494

495

496

## 497 **References**

- 498 Aberra AS, Wang B, Grill WM & Peterchev AV. (2020). Simulation of transcranial magnetic  
499 stimulation in head model with morphologically-realistic cortical neurons. *Brain Stimul* **13**,  
500 175-189.
- 501
- 502 Barr DJ, Levy R, Scheepers C & Tily HJ. (2013). Random effects structure for confirmatory hypothesis  
503 testing: Keep it maximal. *J Mem Lang* **68**, 255-278.
- 504
- 505 Buonomano DV & Merzenich MM. (1998). Cortical plasticity: from synapses to maps. *Annu Rev*  
506 *Neurosci* **21**, 149-186.
- 507
- 508 Casarotto A, Dolfini E, Cardellicchio P, Fadiga L, D'Ausilio A & Koch G. (2023). Mechanisms of  
509 Hebbian-like plasticity in the ventral premotor – primary motor network. *J Physiol* **601**, 211-  
510 226.
- 511
- 512 Chouinard PA, Leonard G & Paus T. (2005). Role of the primary motor and dorsal premotor cortices  
513 in the anticipation of forces during object lifting. *J Neurosci* **25**, 2277-2284.
- 514
- 515 Corp DT, Bereznicki HGK, Clark GM, Youssef GJ, Fried PJ, Jannati A, Davies CB, Gomes-Osman J,  
516 Stamm J, Chung SW, Bowe SJ, Rogasch NC, Fitzgerald PB, Koch G, Di Lazzaro V, Pascual-  
517 Leone A & Enticott PG. (2020). Large-scale analysis of interindividual variability in theta-burst  
518 stimulation data: Results from the 'Big TMS Data Collaboration'. *Brain Stimul* **13**, 1476-1488.
- 519
- 520 Di Lazzaro V, Oliviero A, Pilato F, Mazzone P, Insola A, Ranieri F & Tonali PA. (2003). Corticospinal  
521 volleys evoked by transcranial stimulation of the brain in conscious humans. *Neurol Res* **25**,  
522 143-150.
- 523
- 524 Di Lazzaro V, Oliviero A, Saturno E, Pilato F, Insola A, Mazzone P, Profice P, Tonali P & Rothwell J.  
525 (2001). The effect on corticospinal volleys of reversing the direction of current induced in the  
526 motor cortex by transcranial magnetic stimulation. *Exp Brain Res* **138**, 268-273.
- 527
- 528 Di Lazzaro V, Pilato F, Dileone M, Profice P, Oliviero A, Mazzone P, Insola A, Ranieri F, Meglio M,  
529 Tonali PA & Rothwell JC. (2008). The physiological basis of the effects of intermittent theta  
530 burst stimulation of the human motor cortex. *J Physiol* **586**, 3871-3879.
- 531
- 532 Di Lazzaro V, Profice P, Ranieri F, Capone F, Dileone M, Oliviero A & Pilato F. (2012). I-wave origin  
533 and modulation. *Brain Stimul* **5**, 512-525.
- 534
- 535 Di Lazzaro V, Restuccia D, Oliviero A, Profice P, Ferrara L, Insola A, Mazzone P, Tonali P & Rothwell JC.  
536 (1998). Effects of voluntary contraction on descending volleys evoked by transcranial  
537 stimulation in conscious humans. *J Physiol* **508 ( Pt 2)**, 625-633.
- 538



- 539 Dickins DS, Sale MV & Kamke MR. (2015). Plasticity Induced by Intermittent Theta Burst Stimulation  
540 in Bilateral Motor Cortices Is Not Altered in Older Adults. *Neural plasticity* **2015**, 323409.
- 541
- 542 Fathi D, Ueki Y, Mima T, Koganemaru S, Nagamine T, Tawfik A & Fukuyama H. (2010). Effects of aging  
543 on the human motor cortical plasticity studied by paired associative stimulation. *Clin*  
544 *Neurophysiol* **121**, 90-93.
- 545
- 546 Freitas C, Perez J, Knobel M, Tormos JM, Oberman L, Eldaief M, Bashir S, Vernet M, Peña-Gómez C &  
547 Pascual-Leone A. (2011). Changes in cortical plasticity across the lifespan. *Front Aging*  
548 *Neurosci* **3**, 5-5.
- 549
- 550 Goldsworthy MR, Müller-Dahlhaus F, Ridding MC & Ziemann U. (2015). Resistant Against De-  
551 pression: LTD-Like Plasticity in the Human Motor Cortex Induced by Spaced cTBS. *Cereb*  
552 *Cortex* **25**, 1724-1734.
- 553
- 554 Groppa S, Schlaak BH, Münchau A, Werner-Petroll N, Dünneberger J, Bäumer T, van Nuenen BFL &  
555 Siebner HR. (2012). The human dorsal premotor cortex facilitates the excitability of  
556 ipsilateral primary motor cortex via a short latency cortico-cortical route. *Hum Brain Mapp*  
557 **33**, 419-430.
- 558
- 559 Guerra A, López-Alonso V, Cheeran B & Suppa A. (2020). Variability in non-invasive brain stimulation  
560 studies: Reasons and results. *Neurosci Lett* **719**, 133330.
- 561
- 562 Hamada M, Galea JM, Di Lazzaro V, Mazzone P, Ziemann U & Rothwell JC. (2014). Two distinct  
563 interneuron circuits in human motor cortex are linked to different subsets of physiological  
564 and behavioral plasticity. *J Neurosci* **34**, 12837-12849.
- 565
- 566 Hamada M, Murase N, Hasan A, Balaratnam M & Rothwell JC. (2013). The Role of Interneuron  
567 Networks in Driving Human Motor Cortical Plasticity. *Cereb Cortex* **23**, 1593-1605.
- 568
- 569 Hannah R & Rothwell JC. (2017). Pulse Duration as Well as Current Direction Determines the  
570 Specificity of Transcranial Magnetic Stimulation of Motor Cortex during Contraction. *Brain*  
571 *Stimul* **10**, 106-115.
- 572
- 573 Huang Y-Z, Chen R-S, Fong P-Y, Rothwell JC, Chuang W-L, Weng Y-H, Lin W-Y & Lu C-S. (2018). Inter-  
574 cortical modulation from premotor to motor plasticity. *J Physiol* **596**, 4207-4217.
- 575
- 576 Huang Y-Z, Edwards MJ, Rounis E, Bhatia KP & Rothwell JC. (2005). Theta Burst Stimulation of the  
577 Human Motor Cortex. *Neuron* **45**, 201-206.
- 578
- 579 Huang Y-Z, Rothwell JC, Edwards MJ & Chen R-S. (2008). Effect of Physiological Activity on an NMDA-  
580 Dependent Form of Cortical Plasticity in Human. *Cereb Cortex* **18**, 563-570.
- 581

- 582 Huang Y-Z, Rothwell JC, Lu C-S, Wang J, Weng Y-H, Lai S-C, Chuang W-L, Hung J & Chen R-S. (2009).  
583 The effect of continuous theta burst stimulation over premotor cortex on circuits in primary  
584 motor cortex and spinal cord. *Clin Neurophysiol* **120**, 796-801.
- 585  
586 Koch G, Franca M, Mochizuki H, Marconi B, Caltagirone C & Rothwell JC. (2007). Interactions  
587 between pairs of transcranial magnetic stimuli over the human left dorsal premotor cortex  
588 differ from those seen in primary motor cortex. *J Physiol* **578**, 551-562.
- 589  
590 Leodori G, Fabbrini A, De Bartolo MI, Costanzo M, Ascì F, Palma V, Belvisi D, Conte A & Berardelli A.  
591 (2021). Cortical mechanisms underlying variability in intermittent theta-burst stimulation-  
592 induced plasticity: A TMS-EEG study. *Clin Neurophysiol* **132**, 2519-2531.
- 593  
594 Liao W-Y, Opie GM, Ziemann U & Semmler JG. (2023). Modulation of dorsal premotor cortex  
595 differentially influences I-wave excitability in primary motor cortex of young and older  
596 adults. *J Physiol*.
- 597  
598 Liao W-Y, Sasaki R, Semmler JG & Opie GM. (2022). Cerebellar transcranial direct current stimulation  
599 disrupts neuroplasticity of intracortical motor circuits. *PLoS One* **17**, e0271311.
- 600  
601 Lo S & Andrews S. (2015). To transform or not to transform: using generalized linear mixed models  
602 to analyse reaction time data. *Front Psychol* **6**, 1171-1171.
- 603  
604 Meng H-J, Cao N, Zhang J & Pi Y-L. (2020). Intermittent theta burst stimulation facilitates functional  
605 connectivity from the dorsal premotor cortex to primary motor cortex. *PeerJ* **8**, e9253-  
606 e9253.
- 607  
608 Müller-Dahlhaus JFM, Orekhov Y, Liu Y & Ziemann U. (2008). Interindividual variability and age-  
609 dependency of motor cortical plasticity induced by paired associative stimulation. *Exp Brain*  
610 *Res* **187**, 467-475.
- 611  
612 Müller JF, Orekhov Y, Liu Y & Ziemann U. (2007). Homeostatic plasticity in human motor cortex  
613 demonstrated by two consecutive sessions of paired associative stimulation. *The European*  
614 *journal of neuroscience* **25**, 3461-3468.
- 615  
616 Münchau A, Bloem BR, Irlbacher K, Trimble MR & Rothwell JC. (2002). Functional connectivity of  
617 human premotor and motor cortex explored with repetitive transcranial magnetic  
618 stimulation. *J Neurosci* **22**, 554-561.
- 619  
620 Murakami T, Müller-Dahlhaus F, Lu MK & Ziemann U. (2012). Homeostatic metaplasticity of  
621 corticospinal excitatory and intracortical inhibitory neural circuits in human motor cortex. *J*  
622 *Physiol* **590**, 5765-5781.
- 623  
624 Ni Z, Charab S, Gunraj C, Nelson AJ, Udupa K, Yeh IJ & Chen R. (2010). Transcranial Magnetic  
625 Stimulation in Different Current Directions Activates Separate Cortical Circuits. *J*  
626 *Neurophysiol* **105**, 749-756.

- 627  
628 Ni Z, Isayama R, Castillo G, Gunraj C, Saha U & Chen R. (2015). Reduced dorsal premotor cortex and  
629 primary motor cortex connectivity in older adults. *Neurobiol Aging* **36**, 301-303.
- 630  
631 Nowak DA, Berner J, Herrnberger B, Kammer T, Grön G & Schönfeldt-Lecuona C. (2009). Continuous  
632 theta-burst stimulation over the dorsal premotor cortex interferes with associative learning  
633 during object lifting. *Cortex* **45**, 473-482.
- 634  
635 Opie GM, Cirillo J & Semmler JG. (2018). Age-related changes in late I-waves influence motor cortex  
636 plasticity induction in older adults. *J Physiol* **596**, 2597-2609.
- 637  
638 Opie GM, Hand BJ & Semmler JG. (2020). Age-related changes in late synaptic inputs to corticospinal  
639 neurons and their functional significance: A paired-pulse TMS study. *Brain Stimul* **13**, 239-  
640 246.
- 641  
642 Opie GM, Liao W-Y & Semmler JG. (2022). Interactions Between Cerebellum and the Intracortical  
643 Excitatory Circuits of Motor Cortex: a Mini-Review. *Cerebellum* **21**, 159-166.
- 644  
645 Opie GM & Semmler JG. (2021). Preferential Activation of Unique Motor Cortical Networks With  
646 Transcranial Magnetic Stimulation: A Review of the Physiological, Functional, and Clinical  
647 Evidence. *Neuromodulation* **24**, 813-828.
- 648  
649 Opie GM, Vosnakis E, Ridding MC, Ziemann U & Semmler JG. (2017). Priming theta burst stimulation  
650 enhances motor cortex plasticity in young but not old adults. *Brain Stimul* **10**, 298-304.
- 651  
652 Parikh PJ & Santello M. (2017). Role of human premotor dorsal region in learning a conditional  
653 visuomotor task. *J Neurophysiol* **117**, 445-456.
- 654  
655 Phillips C. (2017). Lifestyle Modulators of Neuroplasticity: How Physical Activity, Mental  
656 Engagement, and Diet Promote Cognitive Health during Aging. *Neural plasticity* **2017**,  
657 3589271.
- 658  
659 Puri R & Hinder MR. (2022). Response bias reveals the role of interhemispheric inhibitory networks  
660 in movement preparation and execution. *Neuropsychologia* **165**, 108120.
- 661  
662 Ridding MC & Ziemann U. (2010). Determinants of the induction of cortical plasticity by non-invasive  
663 brain stimulation in healthy subjects. *J Physiol* **588**, 2291-2304.
- 664  
665 Rossi S, Hallett M, Rossini PM & Pascual-Leone A. (2011). Screening questionnaire before TMS: An  
666 update. *Clin Neurophysiol* **122**, 1686.
- 667  
668 Rossini PM, Burke D, Chen R, Cohen LG, Daskalakis Z, Di Iorio R, Di Lazzaro V, Ferreri F, Fitzgerald PB,  
669 George MS, Hallett M, Lefaucheur JP, Langguth B, Matsumoto H, Miniussi C, Nitsche MA,  
670 Pascual-Leone A, Paulus W, Rossi S, Rothwell JC, Siebner HR, Ugawa Y, Walsh V & Ziemann

- 671 U. (2015). Non-invasive electrical and magnetic stimulation of the brain, spinal cord, roots  
672 and peripheral nerves: Basic principles and procedures for routine clinical and research  
673 application. An updated report from an I.F.C.N. Committee. *Clin Neurophysiol* **126**, 1071-  
674 1107.
- 675
- 676 Sakai K, Ugawa Y, Terao Y, Hanajima R, Furubayashi T & Kanazawa I. (1997). Preferential activation of  
677 different I waves by transcranial magnetic stimulation with a figure-of-eight-shaped coil. *Exp*  
678 *Brain Res* **113**, 24-32.
- 679
- 680 Sale MV, Ridding MC & Nordstrom MA. (2008). Cortisol inhibits neuroplasticity induction in human  
681 motor cortex. *J Neurosci* **28**, 8285-8293.
- 682
- 683 Sanes JN & Donoghue JP. (2000). Plasticity and primary motor cortex. *Annu Rev Neurosci* **23**, 393-  
684 415.
- 685
- 686 Seidler RD, Bernard JA, Burutolu TB, Fling BW, Gordon MT, Gwin JT, Kwak Y & Lipps DB. (2010).  
687 Motor control and aging: links to age-related brain structural, functional, and biochemical  
688 effects. *Neurosci Biobehav Rev* **34**, 721-733.
- 689
- 690 Spampinato DA, Celnik PA & Rothwell JC. (2020). Cerebellar-Motor Cortex Connectivity: One or Two  
691 Different Networks? *J Neurosci* **40**, 4230-4239.
- 692
- 693 Suppa A, Bologna M, Gilio F, Lorenzano C, Rothwell JC & Berardelli A. (2008). Preconditioning  
694 Repetitive Transcranial Magnetic Stimulation of Premotor Cortex Can Reduce But Not  
695 Enhance Short-Term Facilitation of Primary Motor Cortex. *J Neurophysiol* **99**, 564-570.
- 696
- 697 Thirugnanasambandam N, Sparing R, Dafotakis M, Meister IG, Paulus W, Nitsche MA & Fink GR.  
698 (2011). Isometric contraction interferes with transcranial direct current stimulation (tDCS)  
699 induced plasticity – evidence of state-dependent neuromodulation in human motor cortex.  
700 *Restor Neurol Neurosci* **29**, 311-320.
- 701
- 702 Todd G, Flavel SC & Ridding MC. (2009). Priming theta-burst repetitive transcranial magnetic  
703 stimulation with low- and high-frequency stimulation. *Exp Brain Res* **195**, 307-315.
- 704
- 705 Todd G, Kimber TE, Ridding MC & Semmler JG. (2010). Reduced motor cortex plasticity following  
706 inhibitory rTMS in older adults. *Clin Neurophysiol* **121**, 441-447.
- 707
- 708 Trajkovic J, Romei V, Rushworth MFS & Sel A. (2023). Strengthening connectivity between premotor  
709 and motor cortex increases inter-areal communication in the human brain. *bioRxiv*,  
710 2023.2002.2015.528606.
- 711
- 712 Volz LJ, Hamada M, Michely J, Pool E-M, Nettekoven C, Rothwell JC & Grefkes Hermann C. (2019).  
713 Modulation of I-wave generating pathways by theta-burst stimulation: a model of plasticity  
714 induction. *J Physiol* **597**, 5963-5971.

715

716 Volz LJ, Hamada M, Rothwell JC & Grefkes C. (2015). What Makes the Muscle Twitch: Motor System  
717 Connectivity and TMS-Induced Activity. *Cereb Cortex* **25**, 2346-2353.

718

719 Wiethoff S, Hamada M & Rothwell JC. (2014). Variability in Response to Transcranial Direct Current  
720 Stimulation of the Motor Cortex. *Brain Stimul* **7**, 468-475.

721

722 Young-Bernier M, Tanguay AN, Davidson PS & Tremblay F. (2014). Short-latency afferent inhibition is  
723 a poor predictor of individual susceptibility to rTMS-induced plasticity in the motor cortex of  
724 young and older adults. *Front Aging Neurosci* **6**, 182.

725

726 Ziemann U. (2020). I-waves in motor cortex revisited. *Exp Brain Res* **238**, 1601-1610.

727

728

## Figure Legends

**Figure 1.** (A) Subject sample and experimental setup. (B) Experimental procedure. PA, posterior-to-anterior; AP, anterior-to-posterior; LM, lateral-to-medial; RMT, resting motor threshold; AMT, active motor threshold;  $MEP_{1mV}$ , standard MEP of ~ 1mV at baseline;  $MEP_{0.5mV}$ , MEP of ~ 0.5 mV at baseline; PMd, dorsal premotor cortex; iTBS, intermittent theta burst stimulation.

**Figure 2.** Changes in  $PA_{1mV}$  (A, blue),  $AP_{1mV}$  (B, orange),  $PA_{0.5mV}$  (C, blue), and  $AP_{0.5mV}$  (D, orange) measures of corticospinal excitability following PMd iTBS (darker hue) and sham (lighter hue) stimulation in all participants. Data show EMM (95% CI) with individual subject means. \* $P < 0.05$ .

**Figure 3.** Changes in  $PA_{1mV}$  (A, blue) and  $AP_{1mV}$  (B, orange) measures of corticospinal excitability following PMd iTBS-M1 iTBS (darker hue) and PMd sham-M1 iTBS (lighter hue) in young (no stripes) and older adults (stripes) at 5 and 30 minutes. Data show EMM (95% CI) with individual subject means. \* $P < 0.05$ . # $P < 0.05$  compared to 5 minutes in same session.

**Figure 4.** Changes in  $PA_{0.5mV}$  (A, blue) and  $AP_{0.5mV}$  (B, orange) measures of corticospinal excitability following PMd iTBS-M1 iTBS (darker hue) and PMd sham-M1 iTBS (lighter hue) in young (no stripes) and older adults (stripes) at 5 and 30 minutes. (C) Changes in  $AP_{0.5mV}$  following M1 iTBS in all participants (dark orange) at 5 and 30 minutes. Data show EMM (95% CI) with individual subject means. \* $P < 0.05$ .

**Figure 5.** Correlation of ranked changes in post-PMd iTBS measures of corticospinal excitability ( $PA_{1mV}$ , A;  $AP_{1mV}$ , B;  $PA_{0.5mV}$ , C;  $AP_{0.5mV}$ , D) with ranked changes in post-M1 iTBS measures of corticospinal excitability.

**Table 1. Baseline TMS intensities between sessions for young and older adults.**

| Measure                      | Young             |                                | Older             |                                |
|------------------------------|-------------------|--------------------------------|-------------------|--------------------------------|
|                              | PMd iTBS-M1 iTBS  | PMd sham-M1 iTBS               | PMd iTBS-M1 iTBS  | PMd sham-M1 iTBS               |
| <b>PA</b>                    |                   |                                |                   |                                |
| RMT <sub>PA</sub> (% MSO)    | 47.3 [42.3, 52.3] | 47.8 [42.8, 52.8]              | 50.4 [45.4, 55.4] | 51.3 [46.3, 56.3]              |
| AMT <sub>PA</sub> (% MSO)    | 39.9 [36.4, 43.4] | 39.3 [35.8, 42.8]              | 42.6 [39.1, 46.1] | 43.2 [39.7, 46.7]              |
| 1mV <sub>PA</sub> (% MSO)    | 56.5 [49.9, 63.1] | 57.4 [50.8, 64.0]              | 65.4 [58.5, 72.2] | 63.3 [56.4, 70.1]              |
| 0.5mV <sub>PA</sub> (% MSO)  | 53.0 [46.1, 59.9] | 53.8 [46.9, 60.7]              | 61.5 [54.5, 68.4] | 61.3 [54.3, 68.2]              |
| <b>AP</b>                    |                   |                                |                   |                                |
| RMT <sub>AP</sub> (% MSO)    | 61.3 [55.6, 67.0] | 62.3 [56.6, 68.0]              | 66.3 [60.4, 72.2] | 65.3 [59.4, 71.2]              |
| AMT <sub>AP</sub> (% MSO)    | 54.2 [49.0, 59.4] | 54.1 [49.0, 59.3]              | 59.1 [54.0, 64.3] | 57.2 [52.0, 62.4]              |
| 1mV <sub>AP</sub> (% MSO)    | 73.9 [65.6, 82.1] | 73.8 [65.6, 82.0] <sup>a</sup> | 83.8 [74.6, 93.1] | 79.3 [70.0, 88.5] <sup>a</sup> |
| 0.5mV <sub>AP</sub> (% MSO)  | 70.9 [63.5, 78.3] | 71.3 [63.9, 78.7]              | 79.4 [71.4, 89.4] | 76.4 [68.4, 84.4]              |
| <b>LM</b>                    |                   |                                |                   |                                |
| AMT <sub>LM</sub> (% MSO)    | 45.3 [40.5, 50.2] | 45.3 [40.4, 50.1]              | 49.9 [45.1, 54.8] | 48.8 [43.9, 53.7]              |
| <b>TBS</b>                   |                   |                                |                   |                                |
| RMT <sub>Rapid</sub> (% MSO) | 55.7 [50.8, 60.6] | 57.8 [52.9, 62.7]              | 57.7 [52.8, 62.6] | 58.1 [53.2, 63.0]              |

Data show EMM [95% CI; lower, upper]. <sup>a</sup>*P* < 0.05 compared to iTBS session.

**Table 2. Baseline responses of corticospinal excitability and I-wave recruitment between sessions.**

| Measure                  | Young                          |                                | Older                          |                                |
|--------------------------|--------------------------------|--------------------------------|--------------------------------|--------------------------------|
|                          | PMd iTBS-M1 iTBS               | PMd sham-M1 iTBS               | PMd iTBS-M1 iTBS               | PMd sham-M1 iTBS               |
| <b>PA</b>                |                                |                                |                                |                                |
| PA-LM latency (ms)       | 1.39 [0.89, 1.88]              | 1.54 [1.04, 2.03]              | 1.97 [1.47, 2.46]              | 2.02 [1.52, 2.51]              |
| 1mV <sub>PA</sub> (mV)   | 1.03 [0.94, 1.12]              | 0.93 [0.85, 1.01]              | 0.89 [0.81, 0.97] <sup>a</sup> | 0.96 [0.87, 1.04]              |
| 0.5mV <sub>PA</sub> (mV) | 0.53 [0.46, 0.60]              | 0.49 [0.42, 0.56]              | 0.50 [0.43, 0.57]              | 0.51 [0.44, 0.58]              |
| <b>AP</b>                |                                |                                |                                |                                |
| AP-LM latency (ms)       | 3.49 [3.00, 3.98] <sup>b</sup> | 3.54 [3.05, 4.03] <sup>b</sup> | 3.69 [3.20, 4.18] <sup>b</sup> | 3.99 [3.50, 4.48] <sup>b</sup> |
| 1mV <sub>AP</sub> (mV)   | 0.97 [0.87, 1.06]              | 0.88 [0.79, 0.97]              | 1.02 [0.91, 1.14]              | 0.99 [0.88, 1.10]              |
| 0.5mV <sub>AP</sub> (mV) | 0.47 [0.41, 0.53]              | 0.44 [0.39, 0.50]              | 0.45 [0.40, 0.51]              | 0.45 [0.39, 0.50]              |

Data show EMM [95% CI; lower, upper].<sup>a</sup> $P < 0.05$  compared to young. <sup>b</sup> $P < 0.05$  compared to PA of same measure.

**Table 3. Comparison of VAS responses (mean  $\pm$  STD) between sessions.**

| Question                                                                                                    | PMd iTBS-M1 iTBS | PMd sham-M1 iTBS |
|-------------------------------------------------------------------------------------------------------------|------------------|------------------|
| How uncomfortable were the TMS pulses (0, not uncomfortable at all; 10, highly uncomfortable)?              | 2.67 $\pm$ 2.60  | 2.5 $\pm$ 2.79   |
| If there were any twitches in the right hand, how strong were they (0, no twitches; 10, very strong cramp)? | 0.63 $\pm$ 1.40  | 0.60 $\pm$ 1.13  |
| How localised were the sensations from TMS pulses (0, highly localised; 10, widespread)?                    | 2.03 $\pm$ 2.47  | 0.50 $\pm$ 1.04* |

Data show mean  $\pm$  standard deviation. \* $P < 0.0167$  compared to iTBS.



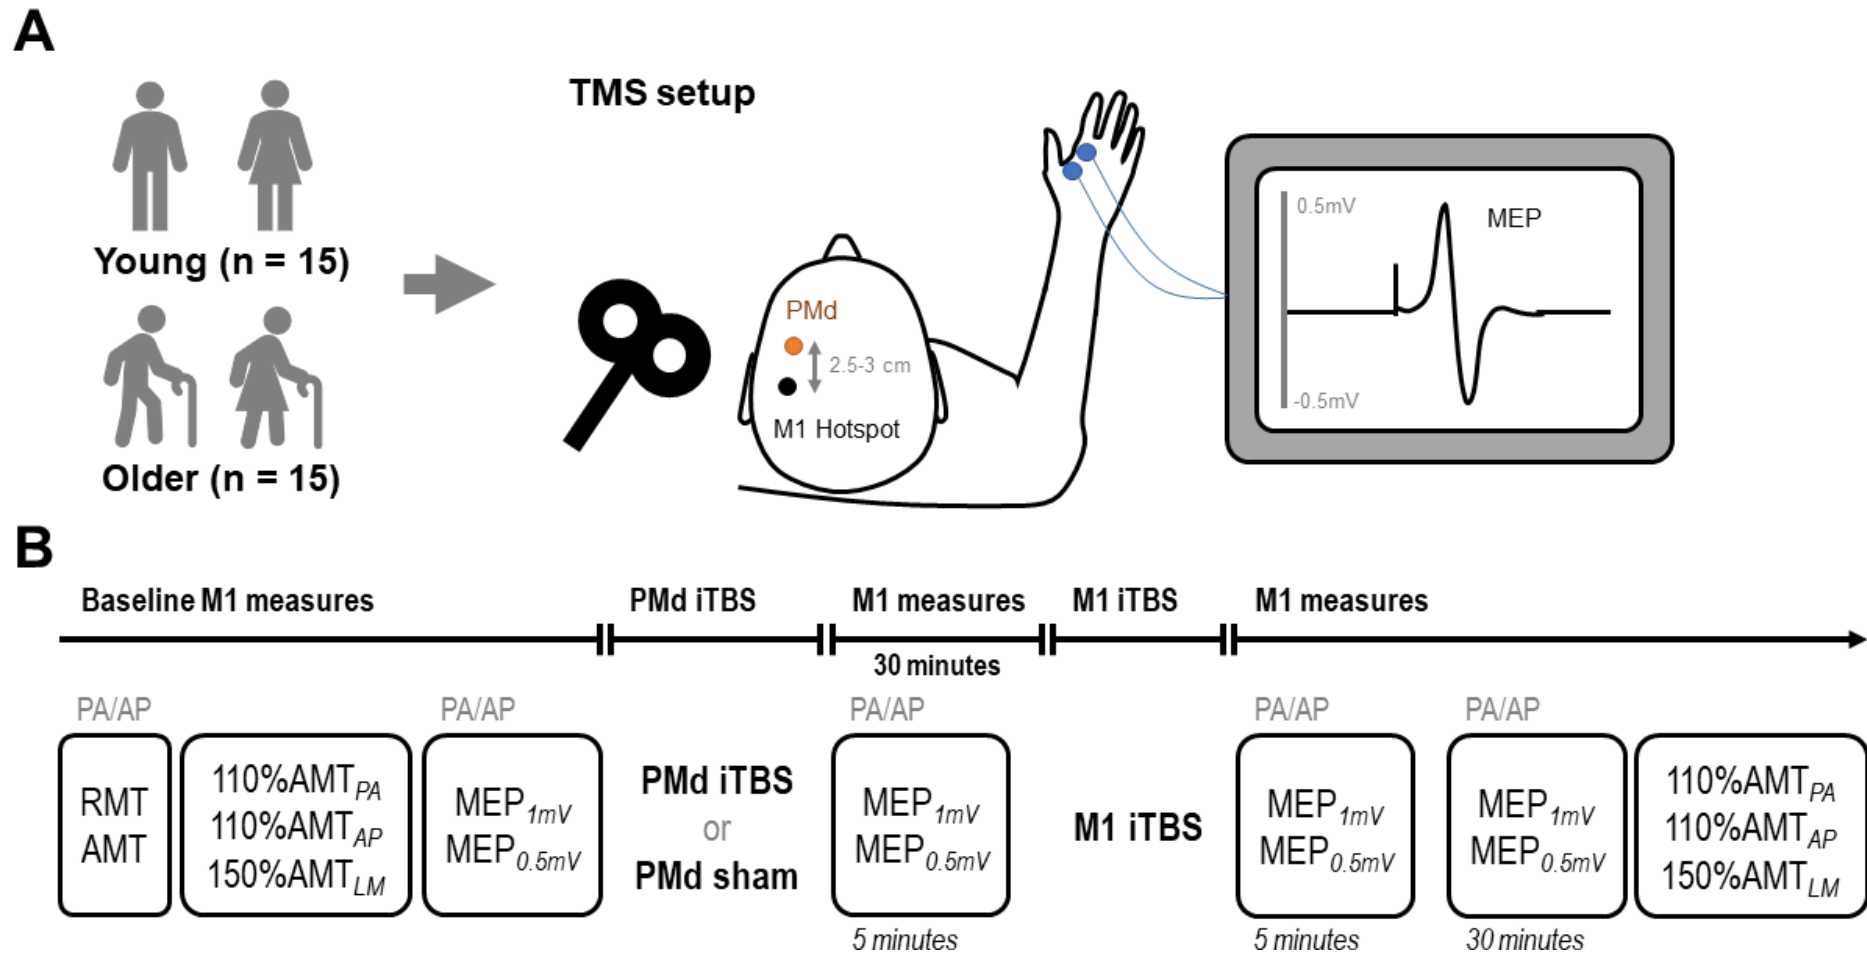

**Figure 1.** (A) Subject sample and experimental setup. (B) Experimental procedure. PA, posterior-to-anterior; AP, anterior-to-posterior; LM, lateral-to-medial; RMT, resting motor threshold; AMT, active motor threshold; MEP<sub>1mV</sub>, standard MEP of ~ 1mV at baseline; MEP<sub>0.5mV</sub>, MEP of ~ 0.5 mV at baseline; PMd, dorsal premotor cortex; iTBS, intermittent theta burst stimulation.

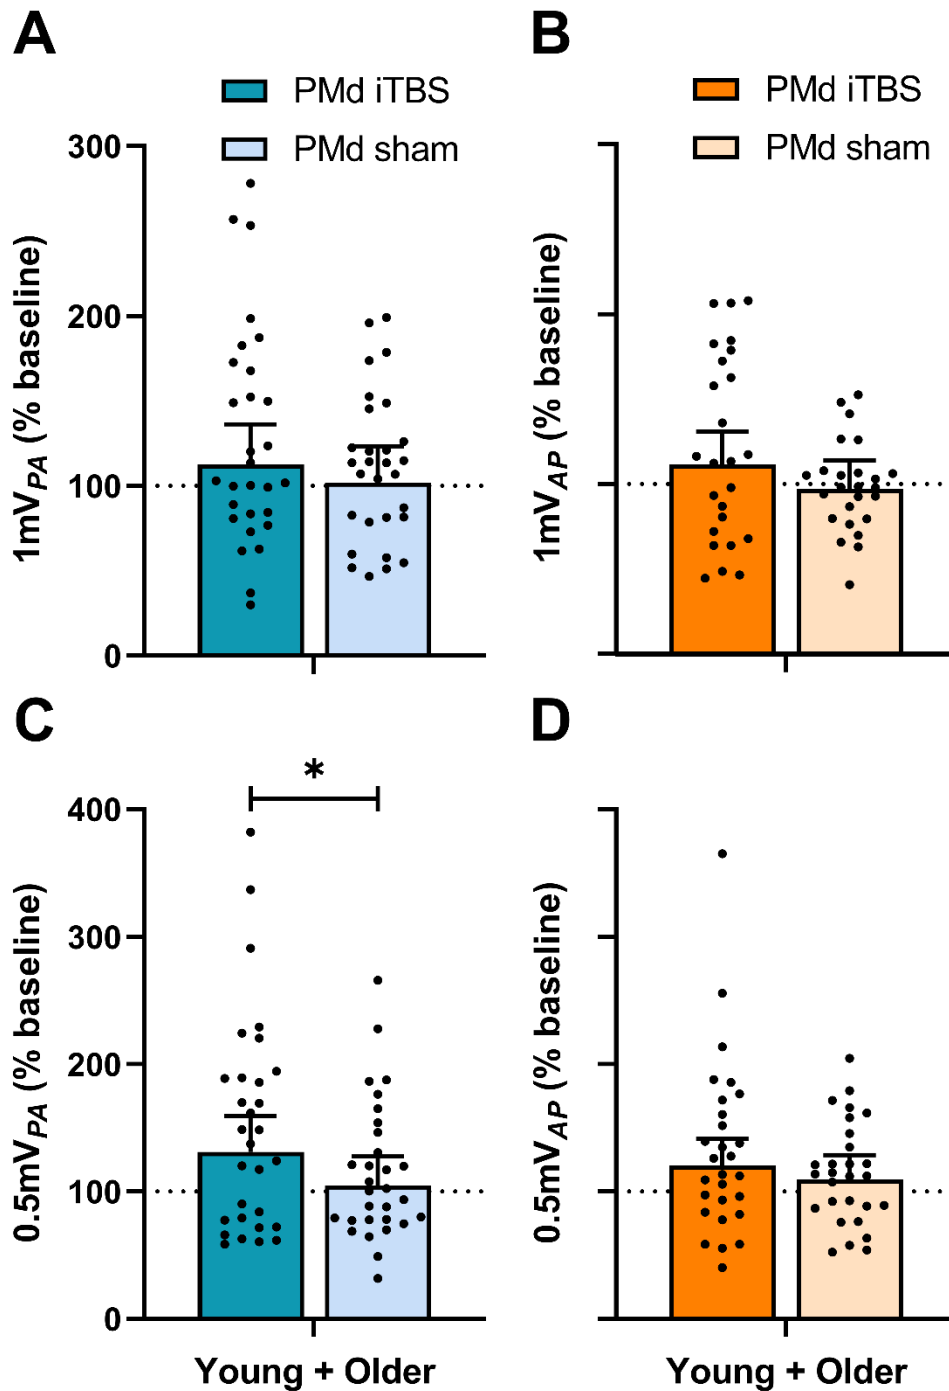

**Figure 2.** Changes in  $PA_{1mV}$  (A, blue),  $AP_{1mV}$  (B, orange),  $PA_{0.5mV}$  (C, blue), and  $AP_{0.5mV}$  (D, orange) measures of corticospinal excitability following PMd iTBS (darker hue) and sham (lighter hue) stimulation in all participants. Data show EMM (95% CI) with individual subject means. \* $P < 0.05$ .

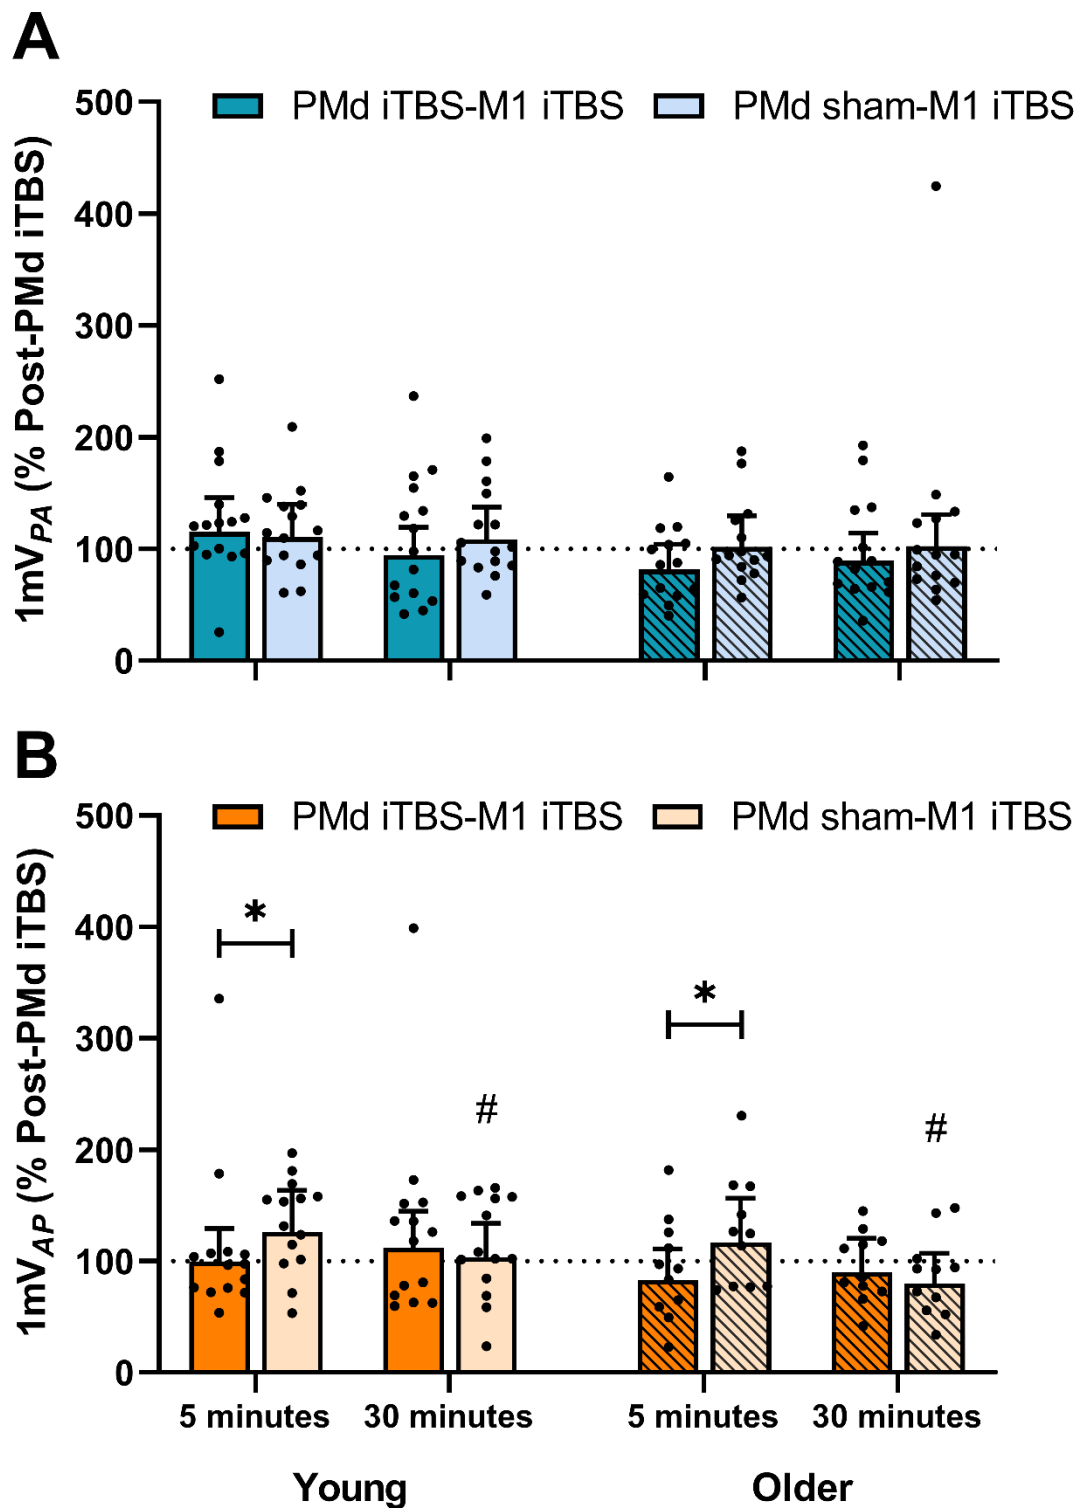

**Figure 3.** Changes in  $PA_{1mV}$  (A, blue) and  $AP_{1mV}$  (B, orange) measures of corticospinal excitability following PMd iTBS-M1 iTBS (darker hue) and PMd sham-M1 iTBS (lighter hue) in young (no stripes) and older adults (stripes) at 5 and 30 minutes. Data show EMM (95% CI) with individual subject means. \* $P < 0.05$ . # $P < 0.05$  compared to 5 minutes in same session.

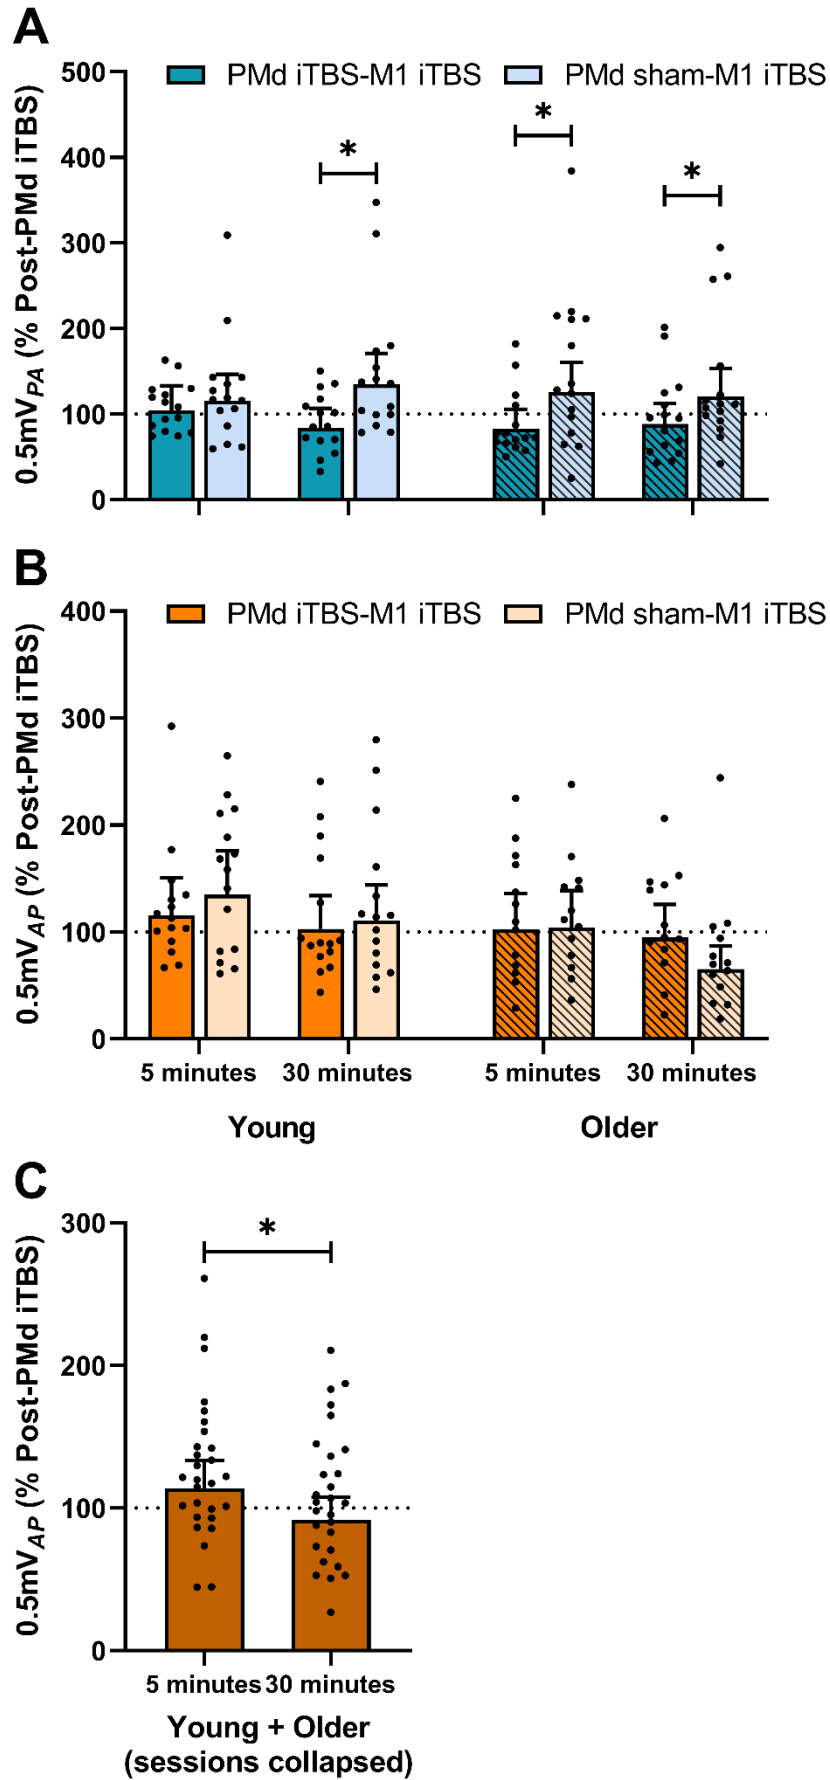

**Figure 4.** Changes in  $PA_{0.5mV}$  (A, blue) and  $AP_{0.5mV}$  (B, orange) measures of corticospinal excitability following PMd iTBS-M1 iTBS (darker hue) and PMd sham-M1 iTBS (lighter hue) in young (no stripes) and older adults (stripes) at 5 and 30 minutes. (C) Changes in  $AP_{0.5mV}$  following M1 iTBS in all participants (dark orange) at 5 and 30 minutes. Data show EMM (95% CI) with individual subject means. \* $P < 0.05$ .

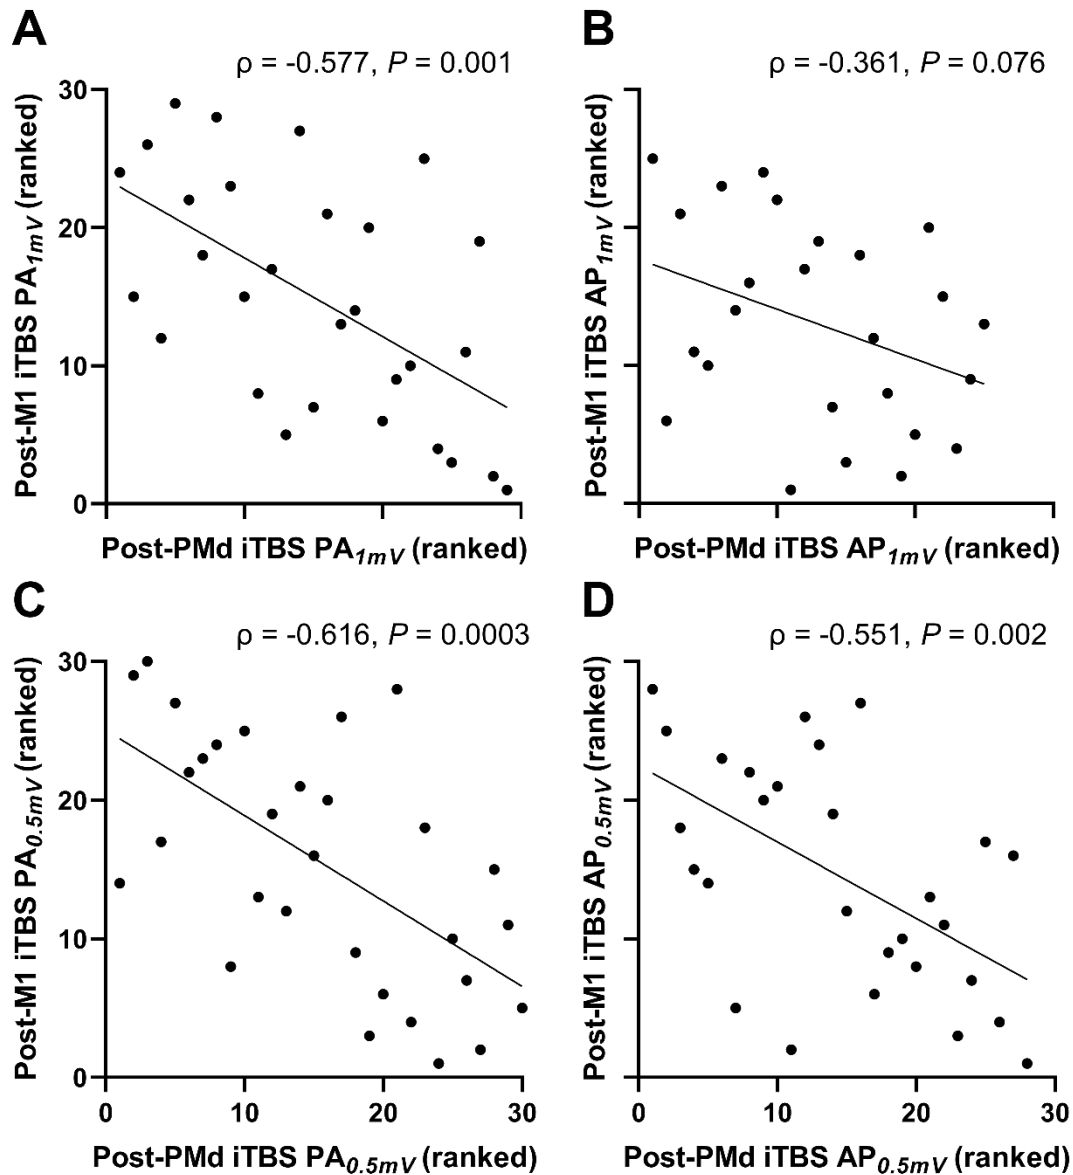

**Figure 5.** Correlation of ranked changes in post-PMd iTBS measures of corticospinal excitability ( $PA_{1mV}$ , A;  $AP_{1mV}$ , B;  $PA_{0.5mV}$ , C;  $AP_{0.5mV}$ , D) with ranked changes in post-M1 iTBS measures of corticospinal excitability.
